# Supplementary material for: The pan-cancer analysis of LRG1 and its potential role in kidney renal clear cell carcinoma
Source: Royal Society of Chemistry journal article supplement (doi:10.1039/d4md00940a), 2025-01-01
Supplement: d4md00940a1.pdf [file d4md00940a1.pdf]

Table S1:

| Cohort        | The Cancer Type                                                  |
|---------------|------------------------------------------------------------------|
| TCGA-ACC      | Adrenocortical carcinoma                                         |
| TCGA-BLCA     | Bladder Urothelial Carcinoma                                     |
| TCGA-BRCA     | Breast invasive carcinoma                                        |
| TCGA-CESC     | Cervical squamous cell carcinoma and endocervical adenocarcinoma |
| TCGA-CHOL     | Cholangiocarcinoma                                               |
| TCGA-COAD     | Colon adenocarcinoma                                             |
| TCGA-COADREAD | Colon adenocarcinoma/Rectum adenocarcinoma Esophageal carcinoma  |
| TCGA-DLBC     | Lymphoid Neoplasm Diffuse Large B-cell Lymphoma                  |
| TCGA-ESCA     | Esophageal carcinoma                                             |
| TCGA-FPPP     | FFPE Pilot Phase II                                              |
| TCGA-GBM      | Glioblastoma multiforme                                          |
| TCGA-GBMLGG   | Glioma                                                           |
| TCGA-HNSC     | Head and Neck squamous cell carcinoma                            |
| TCGA-KICH     | Kidney Chromophobe                                               |
| TCGA-KIPAN    | Pan-kidney cohort (KICH+KIRC+KIRP)                               |
| TCGA-KIRC     | Kidney renal clear cell carcinoma                                |
| TCGA-KIRP     | Kidney renal papillary cell carcinoma                            |
| TCGA-LAML     | Acute Myeloid Leukemia                                           |
| TCGA-LGG      | Brain Lower Grade Glioma                                         |
| TCGA-LIHC     | Liver hepatocellular carcinoma                                   |
| TCGA-LUAD     | Lung adenocarcinoma                                              |
| TCGA-LUSC     | Lung squamous cell carcinoma                                     |
| TCGA-MESO     | Mesothelioma                                                     |
| TCGA-OV       | Ovarian serous cystadenocarcinoma                                |
| TCGA-PAAD     | Pancreatic adenocarcinoma                                        |
| TCGA-PCPG     | Pheochromocytoma and Paraganglioma                               |
| TCGA-PRAD     | Prostate adenocarcinoma                                          |
| TCGA-READ     | Rectum adenocarcinoma                                            |
| TCGA-SARC     | Sarcoma                                                          |
| TCGA-STAD     | Stomach adenocarcinoma                                           |
| TCGA-SKCM     | Skin Cutaneous Melanoma                                          |
| TCGA-STES     | Stomach and Esophageal carcinoma                                 |
| TCGA-TGCT     | Testicular Germ Cell Tumors                                      |
| TCGA-THCA     | Thyroid carcinoma                                                |
| TCGA-THYM     | Thymoma                                                          |
| TCGA-UCEC     | Uterine Corpus Endometrial Carcinoma                             |
| TCGA-UCS      | Uterine Carcinosarcoma                                           |
| TCGA-UVM      | Uveal Melanoma                                                   |
| TARGET-OS     | Osteosarcoma                                                     |
| TARGET-ALL    | Acute Lymphoblastic Leukemia                                     |

|           |                       |
|-----------|-----------------------|
| TARGET-NB | Neuroblastoma         |
| TARGET-WT | High-Risk Wilms Tumor |
